# Supplementary material for: IL-6 Inhibits Starvation-induced Autophagy via the STAT3/Bcl-2 Signaling Pathway
Source: PubMed Central journal article supplement (PMC4637890; doi:10.1038/srep15701), 2015-11-09
Supplement: srep15701-s1.pdf [file srep15701-s1.pdf]

## Supplementary Information

### IL-6 Inhibits Starvation-induced Autophagy via the STAT3/Bcl-2 Signaling

#### Pathway

Beibei Qin<sup>1</sup>, Zhuo Zhou<sup>1</sup>, Jianqin He<sup>1</sup>, Chunlan Yan<sup>1</sup>, Shiping Ding<sup>1\*</sup>

The National Education Base for Basic Medical Sciences, School of Medicine,  
Zhejiang University, Hangzhou 310058, Zhejiang Province, PR China.

\*Corresponding author: [dingshiping@zju.edu.cn](mailto:dingshiping@zju.edu.cn)

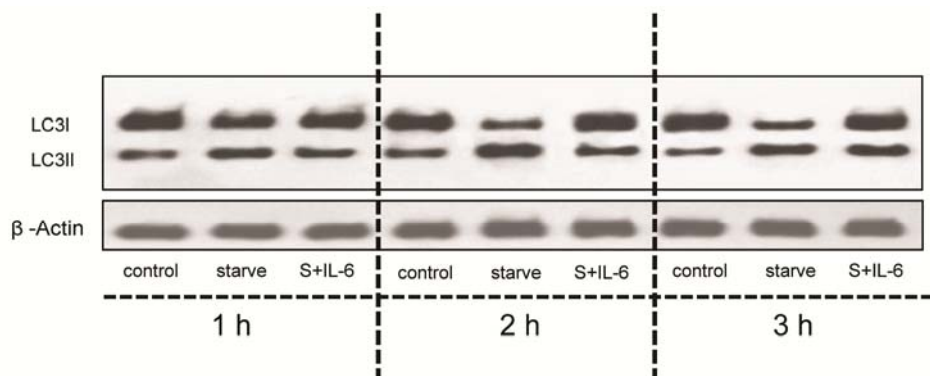

**Supplementary Fig.1** U937 cell was under starvation conditions and incubation with or without IL-6 (30 ng/mL) at the indicated concentration for 1 h, 2 h, 3 h. Western blotting was performed to determine the levels of LC3 lipidation state.  $\beta$ -actin was used as the loading control.
